# Supplementary material for: Spatiotemporal Expression and Molecular Characterization ofmiR-344bandmiR-344cin the Developing Mouse Brain
Source: Hindawi journal article supplement (doi:10.1155/2016/1951250), 2016-01-01
Supplement: f1 [file 1951250.f1.pdf]

## Supplementary Figure Captions

- Suppl. figure 1** Stem-loop pulsed reverse transcription (RT)-quantitative PCR assay validation confirms that the assay is specific to *miR-344b* and *miR-344c*. PCR was carried out for (A) *miR-344b* and (C) *miR-344c* respectively on 50ng, 100ng, 150ng, 200ng and 300ng of spiked genomic DNA (gDNA) to serve as contamination. Minus RT (- RT) control was used to amplify potential gDNA present during RNA extraction. E15.5 mouse brain was used as positive control, where a single band was observed. Random amplification was observed with various concentrations of gDNA contaminants on the 2% (w/v) TAE (Tris-acetic-EDTA) agarose gel. However, no amplification was detected on qPCR using UPL Probe #21 in (B) *miR-344b* and (D) *miR-344c* respectively.
- Suppl. figure 2** The miR-scramble staining serve as a negative control for *miR-344b in situ* hybridization analysis involving three developing brain regions: telencephalon (cerebral cortex), mesencephalon (midbrain), and rhombencephalon (cerebellum). Micrographs were taken at 40x magnification. 4<sup>th</sup> V = 4<sup>th</sup> ventricle, CB = cerebellum, CP = cortical plate, GCL = granular cell layer, IZ = intermediate zone, LI = Layer I, L II/III = Layer II/III, LV = lateral ventricle, MZ = molecular zone, PCL = Purkinje cell layer, PP = preplate, SVZ = subventricular zone, VZ = ventricular zone. Scale bar, 64 µm.
- Suppl. figure 3** The miR-scramble staining serve as a negative control for *miR-344c in situ* hybridization analysis involving three developing brain regions: telencephalon (cerebral cortex), mesencephalon (midbrain), and rhombencephalon (cerebellum). Micrographs were taken at 40x magnification. 4<sup>th</sup> V = 4<sup>th</sup> ventricle, CB = cerebellum, CP = cortical plate, GCL = granular cell layer, IZ = intermediate zone, LI = Layer I, L II/III = Layer II/III, LV = lateral ventricle, MZ = molecular zone, PCL = Purkinje cell layer, PP = preplate, SVZ = subventricular zone, VZ = ventricular zone. Scale bar, 64 µm.

Supplementary Figure 1

A

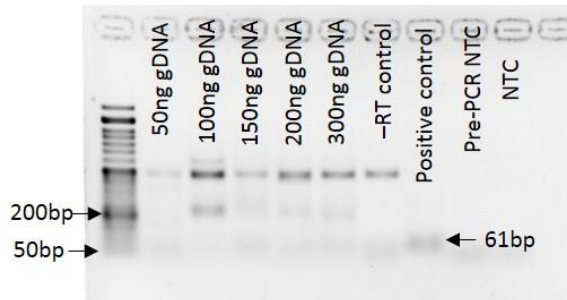

B

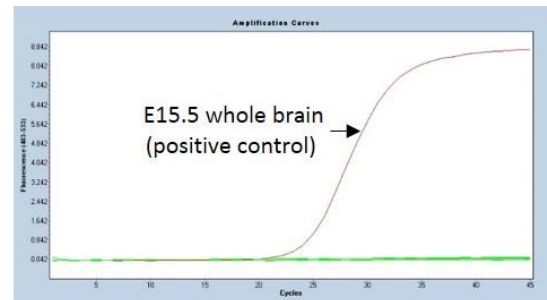

C

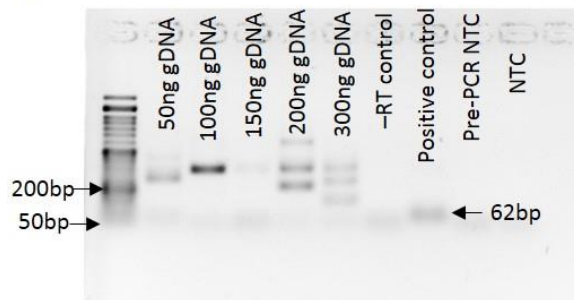

D

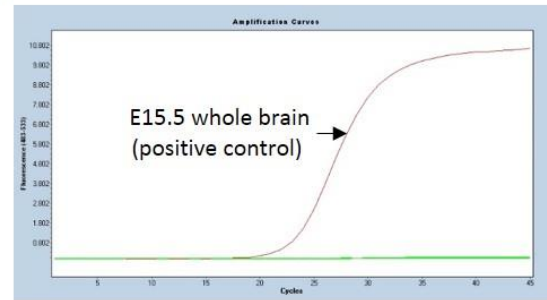

**Supplementary Figure 2**

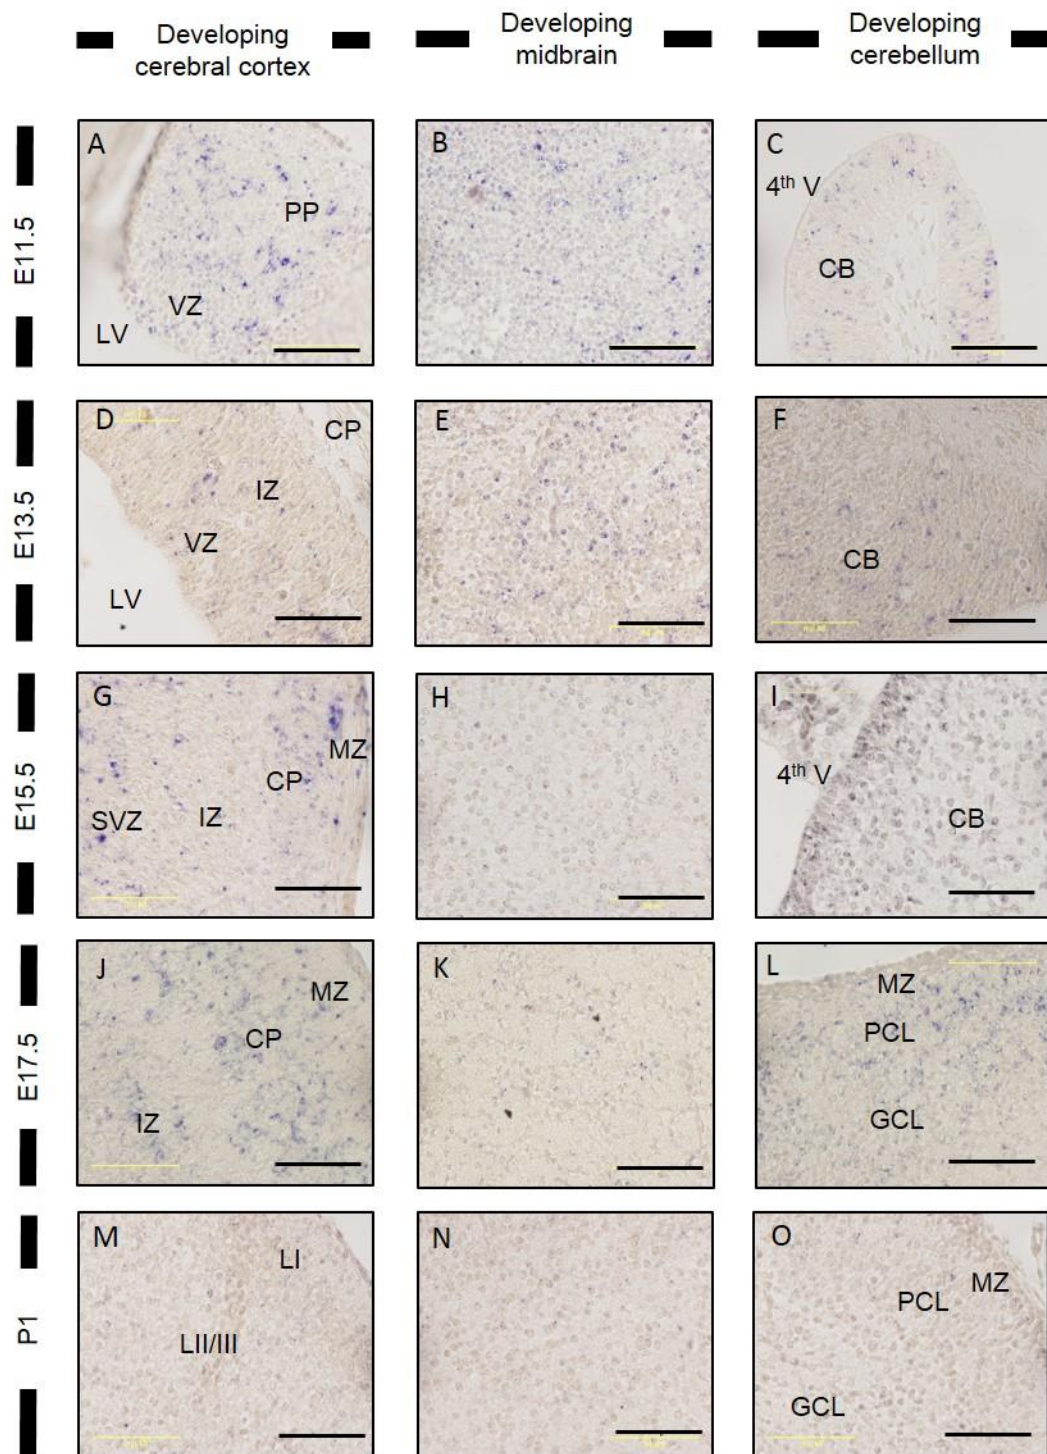

**Supplementary Figure 3**

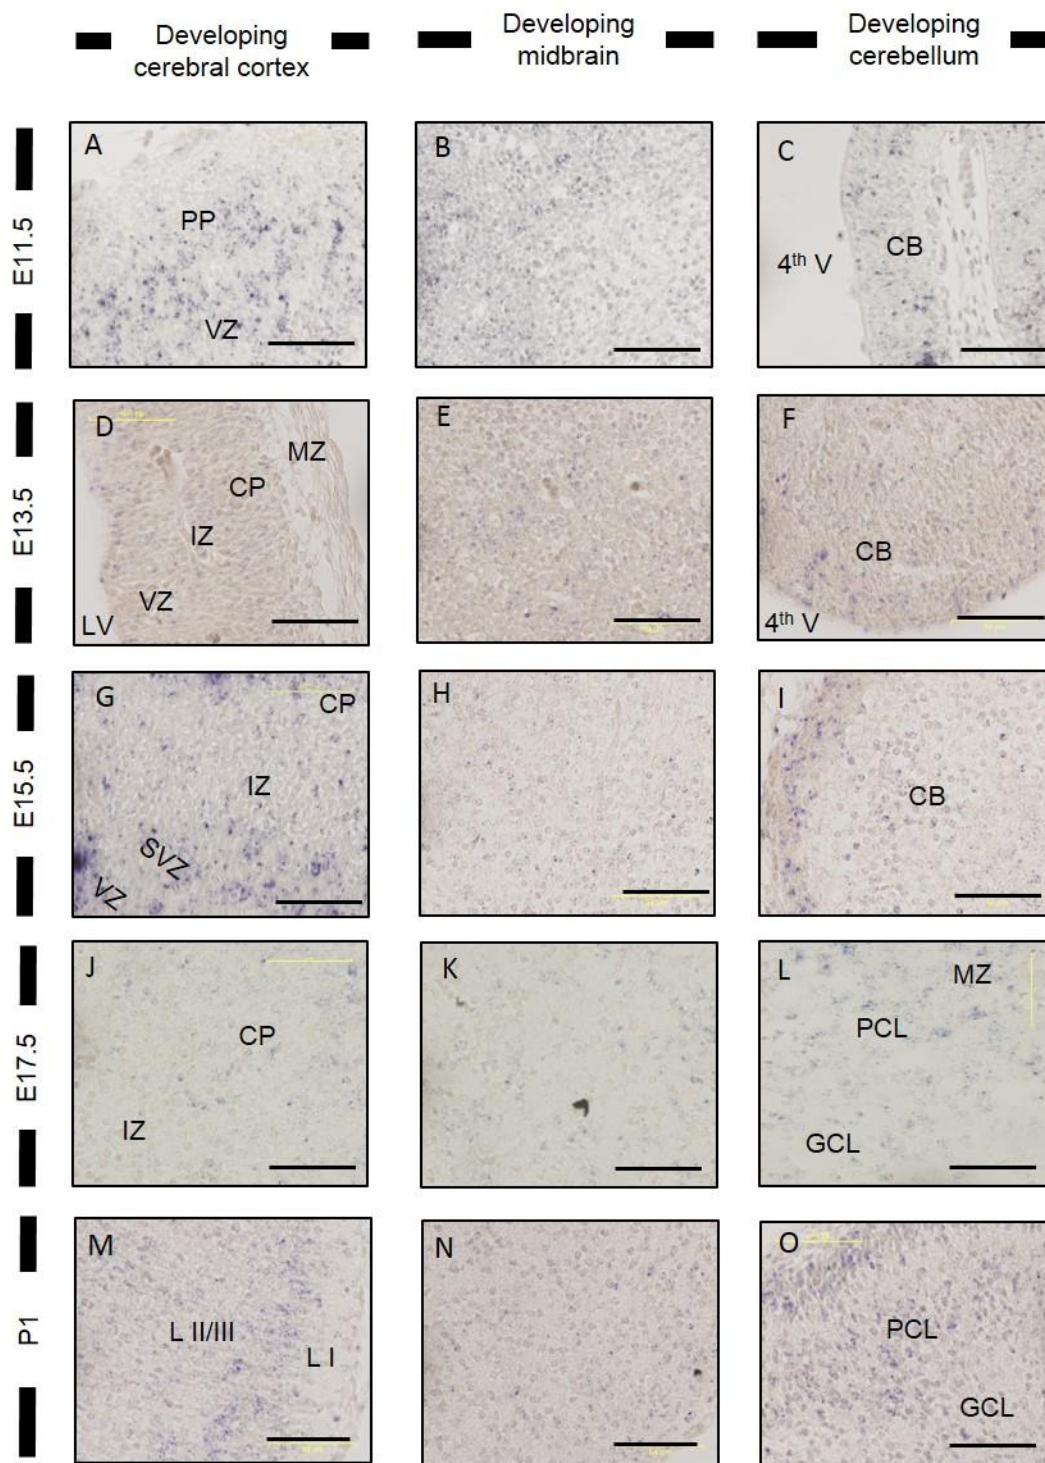

Supplementary Table 1

List of commonly predicted target genes of *miR-344b* by three or four bioinformatics software

| Software                                |                      | Predicted Target Genes |                   |                      |
|-----------------------------------------|----------------------|------------------------|-------------------|----------------------|
| miRanda, miRDB,<br>TargetScan,<br>DIANA | <i>Mtmt10</i>        | <i>Dmd</i>             |                   |                      |
|                                         |                      |                        |                   |                      |
| miRanda, miRDB,<br>TargetScan           | <i>Unc80</i>         | <i>Slc25a3</i>         | <i>Isca1</i>      |                      |
|                                         | <i>Gucy1a2</i>       | <i>Agtr2</i>           | <i>Nmur2</i>      |                      |
|                                         | <i>Gins3</i>         | <i>Mtmt10</i>          | <i>Dmd</i>        |                      |
| miRDB,<br>TargetScan,<br>DIANA          | <i>Jmjd1c</i>        | <i>Kbtbd7</i>          | <i>Nol8</i>       | <i>Socs6</i>         |
|                                         | <i>Fgl2</i>          | <i>Erlin2</i>          | <i>Dusp3</i>      | <i>St18</i>          |
|                                         | <i>Apc</i>           | <i>Phlpp1</i>          | <i>Sh3bgrl</i>    | <i>Ccdc80</i>        |
|                                         | <i>Med14</i>         | <i>C130060K24Rik</i>   | <i>Cndp1</i>      | <i>A330021E22Rik</i> |
|                                         | <i>Urb2</i>          | <i>Cacnb4</i>          | <i>Lrrc4c</i>     | <i>Kitl</i>          |
|                                         | <i>Actr2</i>         | <i>AU019823</i>        | <i>D4Bwg0951e</i> | <i>1810037I17Rik</i> |
|                                         | <i>4930422G04Rik</i> | <i>Ppip5k2</i>         | <i>Srsf1</i>      | <i>Gabra6</i>        |
|                                         | <i>Tpp2</i>          | <i>Kif21a</i>          | <i>Eea1</i>       | <i>Gpr101</i>        |
|                                         | <i>Ept1</i>          | <i>6030405A18Rik</i>   | <i>Tox</i>        | <i>Slc20a1</i>       |
|                                         | <i>Olig2</i>         | <i>Fam151b</i>         | <i>Lonrf3</i>     | <i>A830018L16Rik</i> |
|                                         | <i>Sgpp1</i>         | <i>Tlk1</i>            | <i>Ccdc14</i>     | <i>Dse</i>           |
|                                         | <i>Exo1</i>          | <i>Fgfr2</i>           | <i>Ibsp</i>       | <i>Mtmt10</i>        |
|                                         | <i>Dmd</i>           |                        |                   |                      |
|                                         | <i>Fmr1</i>          | <i>Atrx</i>            | <i>Rab14</i>      | <i>Zfp800</i>        |
| miRanda,<br>TargetScan,<br>DIANA        | <i>Ghr</i>           | <i>Gad2</i>            | <i>Mtmt10</i>     | <i>Dmd</i>           |
|                                         |                      |                        |                   |                      |
| miRanda, miRDB,<br>DIANA                | <i>Zranb2</i>        | <i>Mtmt10</i>          | <i>Dmd</i>        |                      |

**Note:** Targeted genes highlighted in red were identified as transcription factors. Only *Jmjd1c*, *Olig2*, *Tox* and *St18* were expressed in both embryonic and adult mouse brain.

**Supplementary Table 2**

**List of commonly predicted target genes of *miR-344c* by three or four bioinformatics software**

| Software                                | Predicted Target Genes |                |                 |                      |
|-----------------------------------------|------------------------|----------------|-----------------|----------------------|
| miRanda, miRDB,<br>TargetScan,<br>DIANA | <i>Otx2</i>            | <i>Fam118a</i> | <i>Olfr1426</i> | <i>Tmem131</i>       |
|                                         | <i>Pnpla8</i>          | <i>Tmpo</i>    | <i>Pou4f1</i>   | <i>Stau1</i>         |
|                                         | <i>Erich1</i>          |                |                 |                      |
| miRanda, miRDB,<br>TargetScan           | <i>Adam9</i>           | <i>Slco2b1</i> | <i>Acap2</i>    | <i>Atxn1l</i>        |
|                                         | <i>Plxnc1</i>          | <i>Gnptg</i>   | <i>Kdm1a</i>    | <i>Gda</i>           |
|                                         | <i>Otx2</i>            | <i>Fam118a</i> | <i>Olfr1426</i> | <i>Tmem131</i>       |
|                                         | <i>Pnpla8</i>          | <i>Tmpo</i>    | <i>Pou4f1</i>   | <i>Stau1</i>         |
|                                         | <i>Erich1</i>          |                |                 |                      |
| miRDB,<br>TargetScan,<br>DIANA          | <i>Zfp959</i>          | <i>Cetn1</i>   | <i>Scrt2</i>    | <i>Col6a4</i>        |
|                                         | <i>Otx2</i>            | <i>Fam118a</i> | <i>Olfr1426</i> | <i>Tmem131</i>       |
|                                         | <i>Pnpla8</i>          | <i>Tmpo</i>    | <i>Pou4f1</i>   | <i>Stau1</i>         |
|                                         | <i>Erich1</i>          |                |                 |                      |
| miRanda,<br>TargetScan,<br>DIANA        | <i>Abcg1</i>           | <i>Siah2</i>   | <i>Rnf13</i>    | <i>Manea</i>         |
|                                         | <i>Emr4</i>            | <i>Fbxo11</i>  | <i>Gm5460</i>   | <i>Mmp25</i>         |
|                                         | <i>Cks1b</i>           | <i>Esrrg</i>   | <i>Fbln7</i>    | <i>Tigd2</i>         |
|                                         | <i>Gad1</i>            | <i>Mtmr10</i>  | <i>Tyk2</i>     | <i>Mapkapk3</i>      |
|                                         | <i>Cbx4</i>            | <i>Gm4894</i>  | <i>Itgb8</i>    | <i>Fat4</i>          |
|                                         | <i>Mex3c</i>           | <i>Adpgk</i>   | <i>Arhgap24</i> | <i>Rpusd2</i>        |
|                                         | <i>Mllt11</i>          | <i>Rad23b</i>  | <i>Syngn2</i>   | <i>2310047B19Rik</i> |
|                                         | <i>Otx2</i>            | <i>Fam118a</i> | <i>Olfr1426</i> | <i>Tmem131</i>       |
|                                         | <i>Pnpla8</i>          | <i>Tmpo</i>    | <i>Pou4f1</i>   | <i>Stau1</i>         |
|                                         | <i>Erich1</i>          |                |                 |                      |
| miRanda, miRDB,<br>DIANA                | <i>Otx2</i>            | <i>Fam118a</i> | <i>Olfr1426</i> | <i>Tmem131</i>       |
|                                         | <i>Pnpla8</i>          | <i>Tmpo</i>    | <i>Pou4f1</i>   | <i>Stau1</i>         |
|                                         | <i>Erich1</i>          |                |                 |                      |

**Note:** Targeted genes highlighted in red were identified as transcription factors. Only *Otx2* and *Pou4f1* were expressed in both embryonic and adult mouse brain.
